# Supplementary material
Source: PubMed Central journal article supplement (PMC3250046)
Supplement: supp_111.042283_42283_Supplemental_material.pdf [file supp_111.042283_42283_Supplemental_material.pdf]

## Supplementary Material

### *In vitro* glucuronidation of the antibacterial triclocarban and its oxidative metabolites

Schebb N.H. , Franze B., Maul, R., Ranganathan A. and Hammock B.D.

#### *Drug Metabolism and Disposition*

#### **Supplementary Table S1**

Optimized ESI-MS parameters for detection of TCC and its metabolites in SRM mode.

| compound                  | <i>m/z</i> |          | cone<br>voltage [V] | collision<br>energy [V] |
|---------------------------|------------|----------|---------------------|-------------------------|
|                           | [M-H]      | fragment |                     |                         |
| DCC (I.S.)                | 279        | 126      | 28                  | 16                      |
| TCC                       | 313        | 160      | 26                  | 15                      |
| 2'-OH-TCC                 | 329        | 168      | 24                  | 14                      |
| 6-OH-TCC                  | 329        | 202      | 22                  | 14                      |
| 3'-OH-TCC                 | 329        | 168      | 24                  | 14                      |
| 2'-SO <sub>3</sub> -O-TCC | 409        | 168      | 28                  | 25                      |
| <i>N</i> -gluc-TCC        | 489        | 336      | 30                  | 19                      |
| <i>N'</i> -gluc-TCC       | 489        | 302      | 40                  | 12                      |
| 2'- <i>O</i> -gluc-TCC    | 505        | 168      | 40                  | 12                      |
| 6- <i>O</i> -gluc-TCC     | 505        | 343      | 40                  | 12                      |
| 3'- <i>O</i> -gluc-TCC    | 505        | 344      | 40                  | 12                      |

## Supplementary Table S2

Activity of the microsomal preparations for the conjugation of 4-(trifluoromethyl) umbelliferone (TFMU) and trifluoperazine (TFP). Microsomal incubations with 100  $\mu$ M TFMU and 200  $\mu$ M were carried out as described for TCC and its metabolites. The glucuronide concentration was determined by HPLC as described previously (Maul et al. 2011; Uchaipichat et al, 2006). The activity and SD ( $\text{nmol min}^{-1} \text{mg protein}^{-1}$ ) are given as mean of three independent determinations.

| microsomes /<br>UGT  | <i>activity</i>                               |                                              |
|----------------------|-----------------------------------------------|----------------------------------------------|
|                      | TFMU<br>$\text{nmol min}^{-1} \text{mg}^{-1}$ | TFP<br>$\text{pmol min}^{-1} \text{mg}^{-1}$ |
| HLM                  | 55.7 $\pm$ 3.93                               | 12.7 $\pm$ 3.6                               |
| MLM                  | 46.4 $\pm$ 5.32                               | <LOD (5)                                     |
| CLM                  | 107 $\pm$ 1.48                                | 127 $\pm$ 3.7                                |
| RLM                  | 70.8 $\pm$ 3.76                               | <LOD (5)                                     |
| HIM                  | 10.4 $\pm$ 0.82                               | <LOD (5)                                     |
| HKM                  | 30.0 $\pm$ 1.28                               | <LOD (5)                                     |
| UGT1A1               | 2.30 $\pm$ 0.17                               |                                              |
| UGT1A3               | 1.93 $\pm$ 0.32                               |                                              |
| UGT1A4               | <LOD (0.04)                                   | 488 $\pm$ 20.6                               |
| UGT1A6               | 20.7 $\pm$ 0.45                               |                                              |
| UGT1A7               | 6.69 $\pm$ 0.75                               |                                              |
| UGT1A8               | 2.44 $\pm$ 0.03                               |                                              |
| UGT1A9               | 10.8 $\pm$ 0.96                               |                                              |
| UGT1A10              | 2.44 $\pm$ 0.03                               |                                              |
| UGT2B4               | 0.67 $\pm$ 0.13                               |                                              |
| UGT2B7               | 2.73 $\pm$ 0.10                               |                                              |
| UGT2B15              | 3.19 $\pm$ 0.05                               |                                              |
| UGT2B17 <sup>1</sup> | <LOQ (0.2)                                    |                                              |

<sup>1</sup> Activity of 0.37  $\text{nmol min}^{-1} \text{mg protein}^{-1}$  for the conjugation of the substrate eugenol (According to manufacturer)

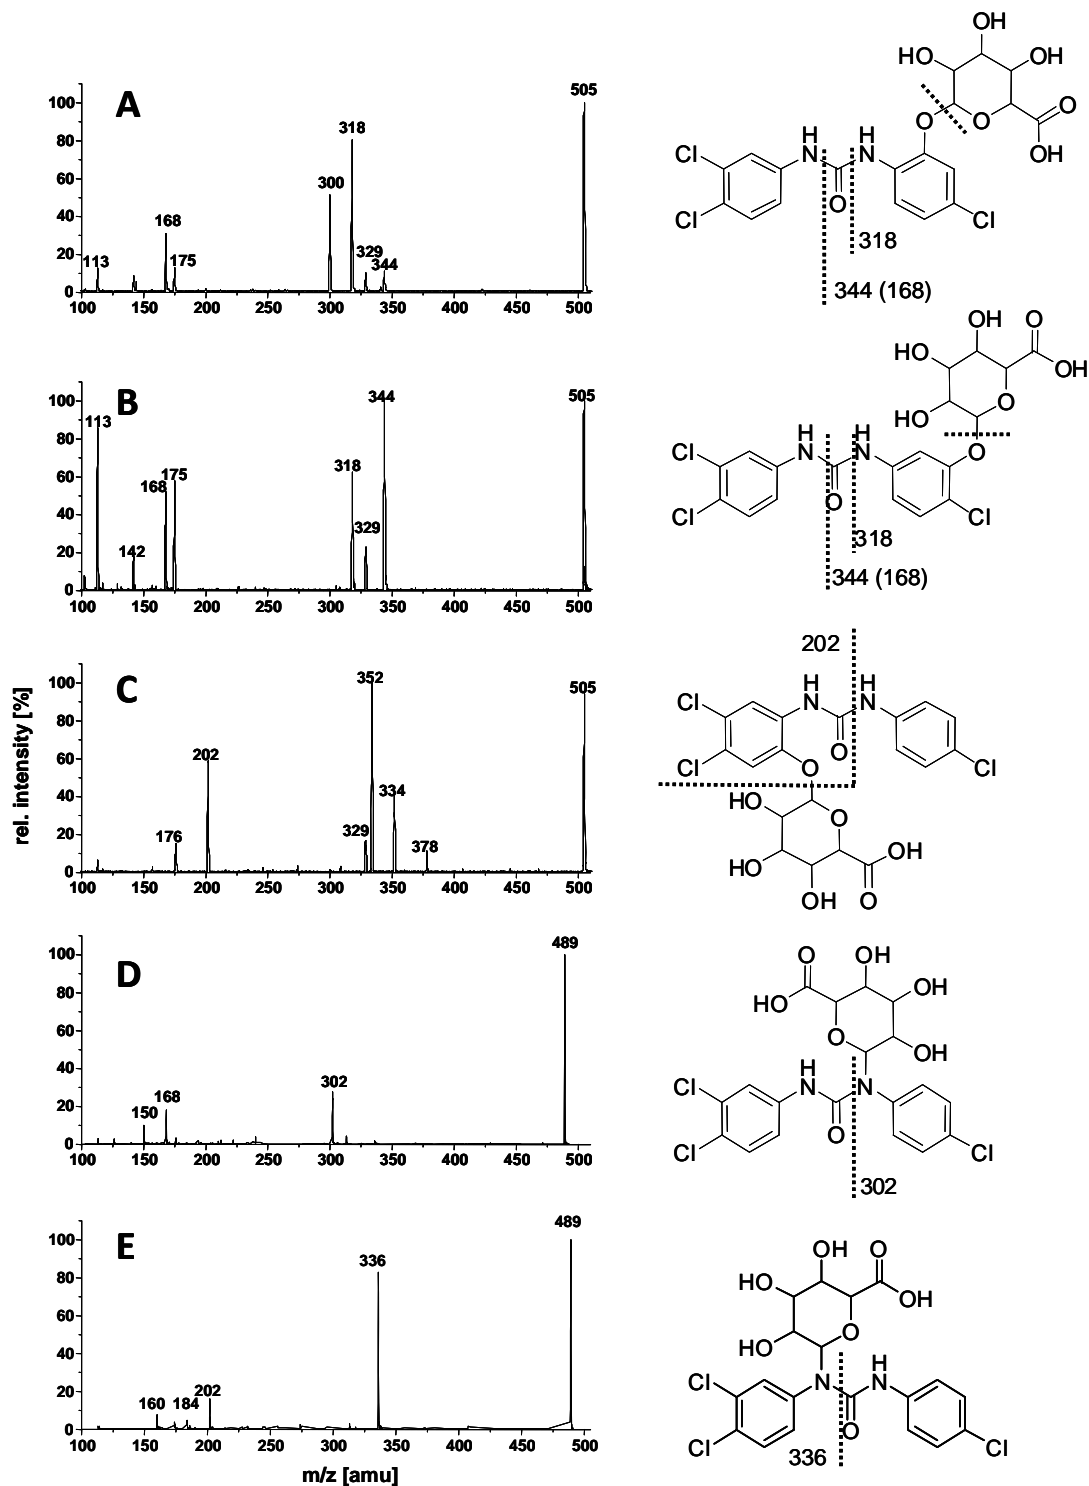

**Figure S1:**

**Left:** Negative electrospray ionization product ion spectra of the TCC-glucuronide conjugates. **A:** 2'-O-gluc TCC; **B:** 3'-O-gluc-TCC; **C:** 6-O-gluc-TCC; **D:** N'-gluc-TCC, **E:** N-gluc-TCC. **Right:** Structures of the glucuronides. The lines depict the fragmentation sites leading to the major fragments. The adjacent numbers show the *m/z* values of the resulting fragments.

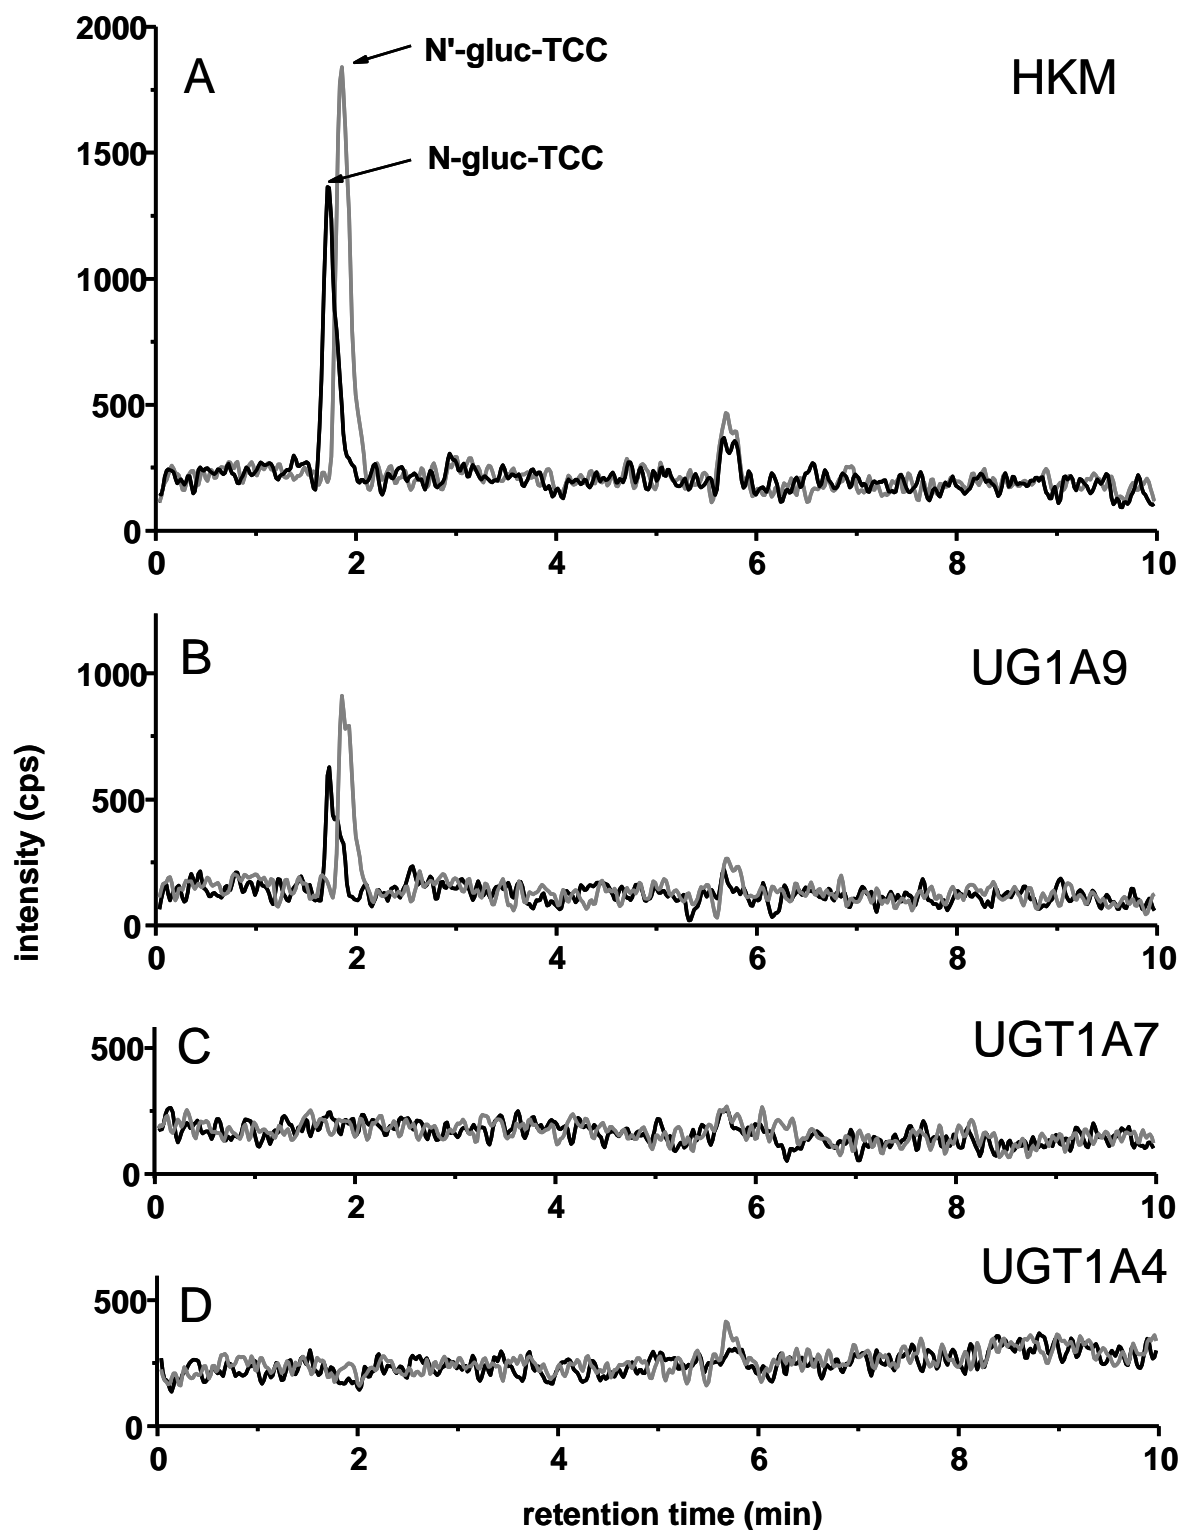

**Figure S2:**

LC-ESI-MS/MS chromatograms of microsomal incubations of TCC. Shown are the SRM signals of *N*-Gluc-TCC- (black) and *N*-Gluc-TCC (grey) of 30 minute incubations (25  $\mu$ g/ml protein) of TCC with (A) HKM and (B) UGT1A9. Analysis after incubation with (C) UGT1A7 and (D) UGT1A4 are shown exemplary for microsomal preparations not converting TCC.

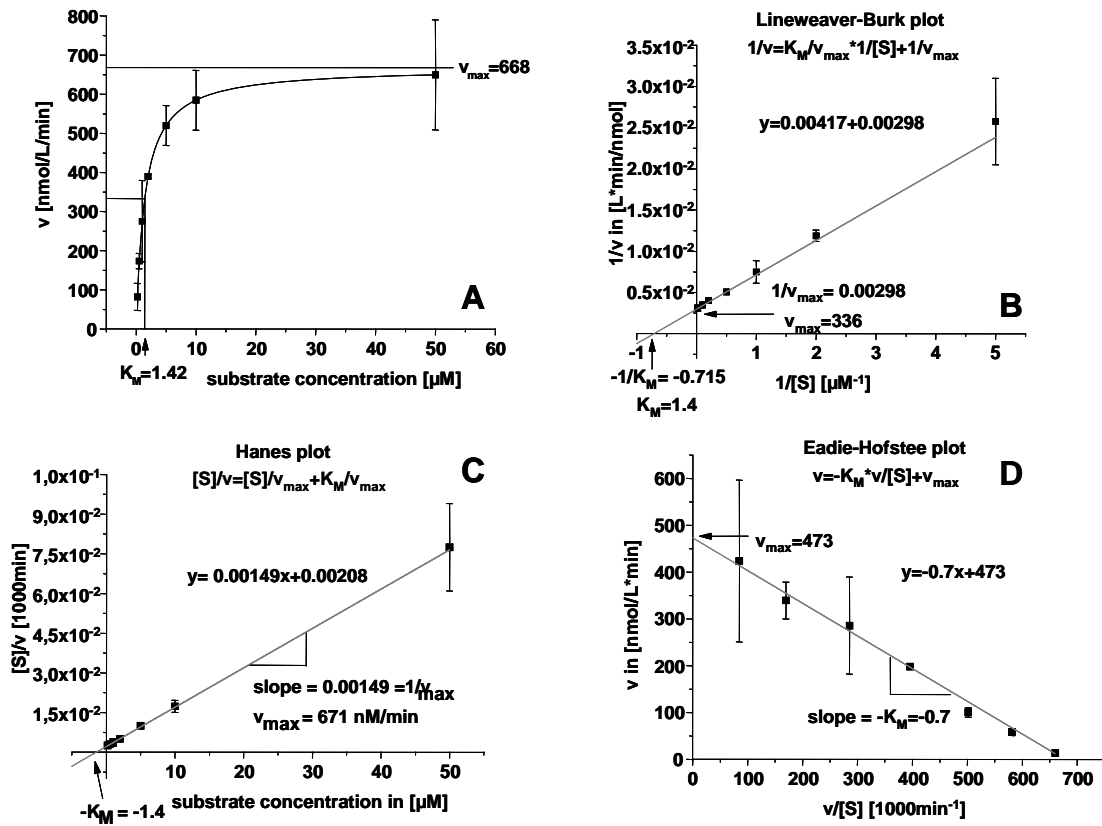

**Figure S3**

Determination of  $K_M$  and  $v_{\text{max}}$  values by fitting to the Michaelis-Menten function and utilization of various linearization methods. The data derived from a glucuronidation experiment of 2'-OH-TCC by CLM is shown exemplarily. **A**: Mathematical fitting **B**: Lineweaver-Burk plot; **C**: Hanes plot; **D**: Eadie-Hofstee plot.
